# Supplementary material for: The OsNRAMP1 iron transporter is involved in Cd accumulation in rice
Source: PubMed Central journal article supplement — J Exp Bot. 2011 Jun 22;62(14):4843–50. doi: 10.1093/jxb/err136 (PMC3192999; doi:10.1093/jxb/err136), 2011-06-22

## **The OsNRAMP1 iron transporter is involved in Cd accumulation in rice**

Ryuichi Takahashi<sup>1</sup>, Yasuhiro Ishimaru<sup>1</sup>, Takeshi Senoura<sup>1</sup>, Hugo Shimo<sup>1</sup>, Satoru Ishikawa<sup>2</sup>, Tomohito Arao<sup>2</sup>, Hiromi Nakanishi<sup>1</sup> and Naoko K. Nishizawa<sup>1,3</sup>

<sup>1</sup>Graduate School of Agricultural and Life Sciences, The University of Tokyo, 1-1-1 Yayoi, Bunkyo-ku, Tokyo, 113-8657

<sup>2</sup>National Institute for Agro-Environmental Sciences, 3-1-3 Kannondai, Tsukuba, Ibaraki, 305-8604

<sup>3</sup>Research Institute for Bioresources and Biotechnology, Ishikawa Prefectural University, 1-308 Suematsu, Nonoichi-machi, Ishikawa, 921-8836, Japan

Supplementary materials

**Fig. S1.** Expression of *OsNRAMP1* in 35S-rice.

**Fig. S2.** Metal concentrations of the roots (A, B, C, D) and leaves (E, F, G, H) of 35S-rice grown in the absence (control) or presence of 1  $\mu\text{M}$   $\text{CdCl}_2$ . The results are presented as the means  $\pm$  SD of triplicate samples. Asterisks indicate significantly different with WT at \* $P < 0.05$  and \*\* $P < 0.01$  by Student's *t*-test.

**Fig. S3.** Metal concentrations of the roots (A, B, C) and leaves (D, E, F) of Sasanishiki (Sa) and Habataki (Ha) grown in the absence (control) or presence of 1  $\mu\text{M}$   $\text{CdCl}_2$ . The results are presented as the means  $\pm$  SD of triplicate samples. Different letters indicate significant differences at  $P < 0.01$  by Tukey–Kramer test.

Figure S1

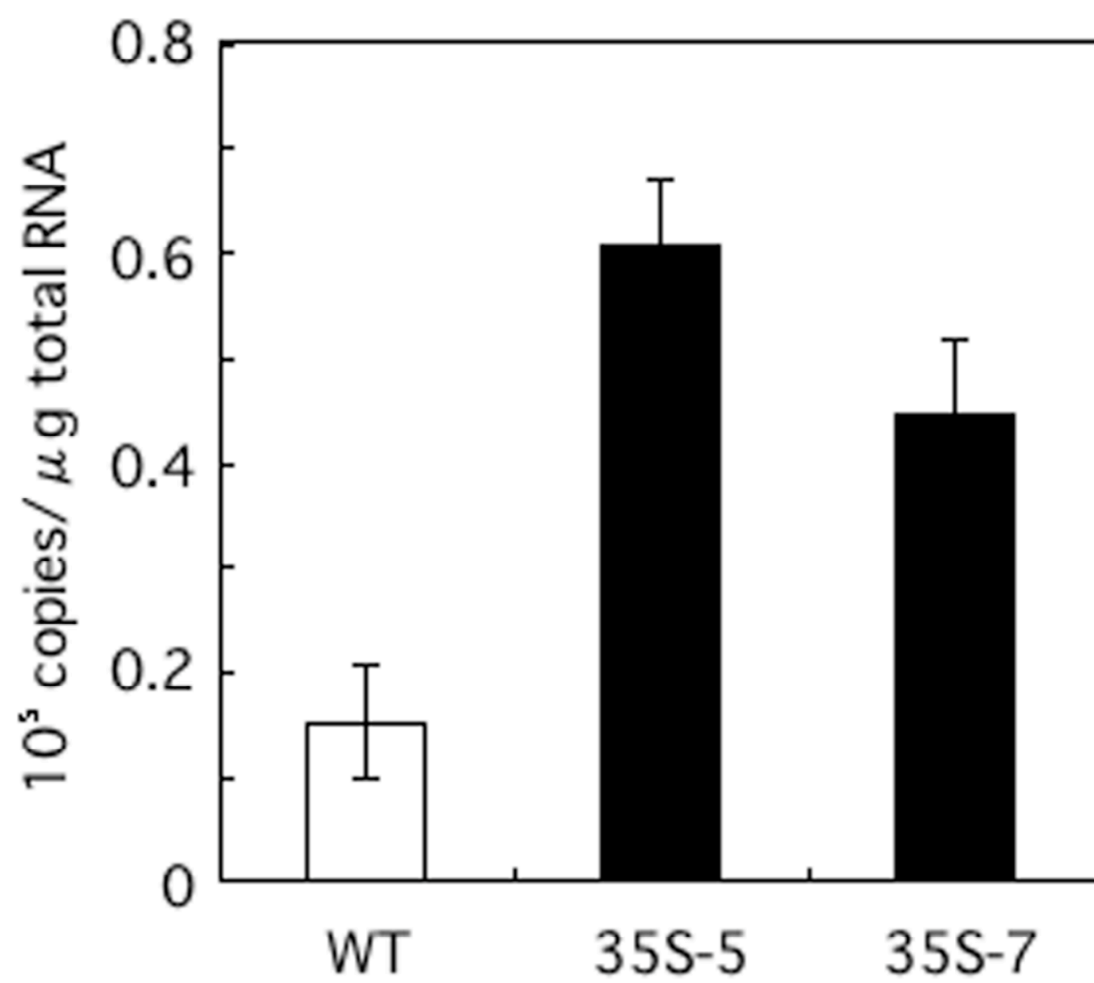

Figure S2

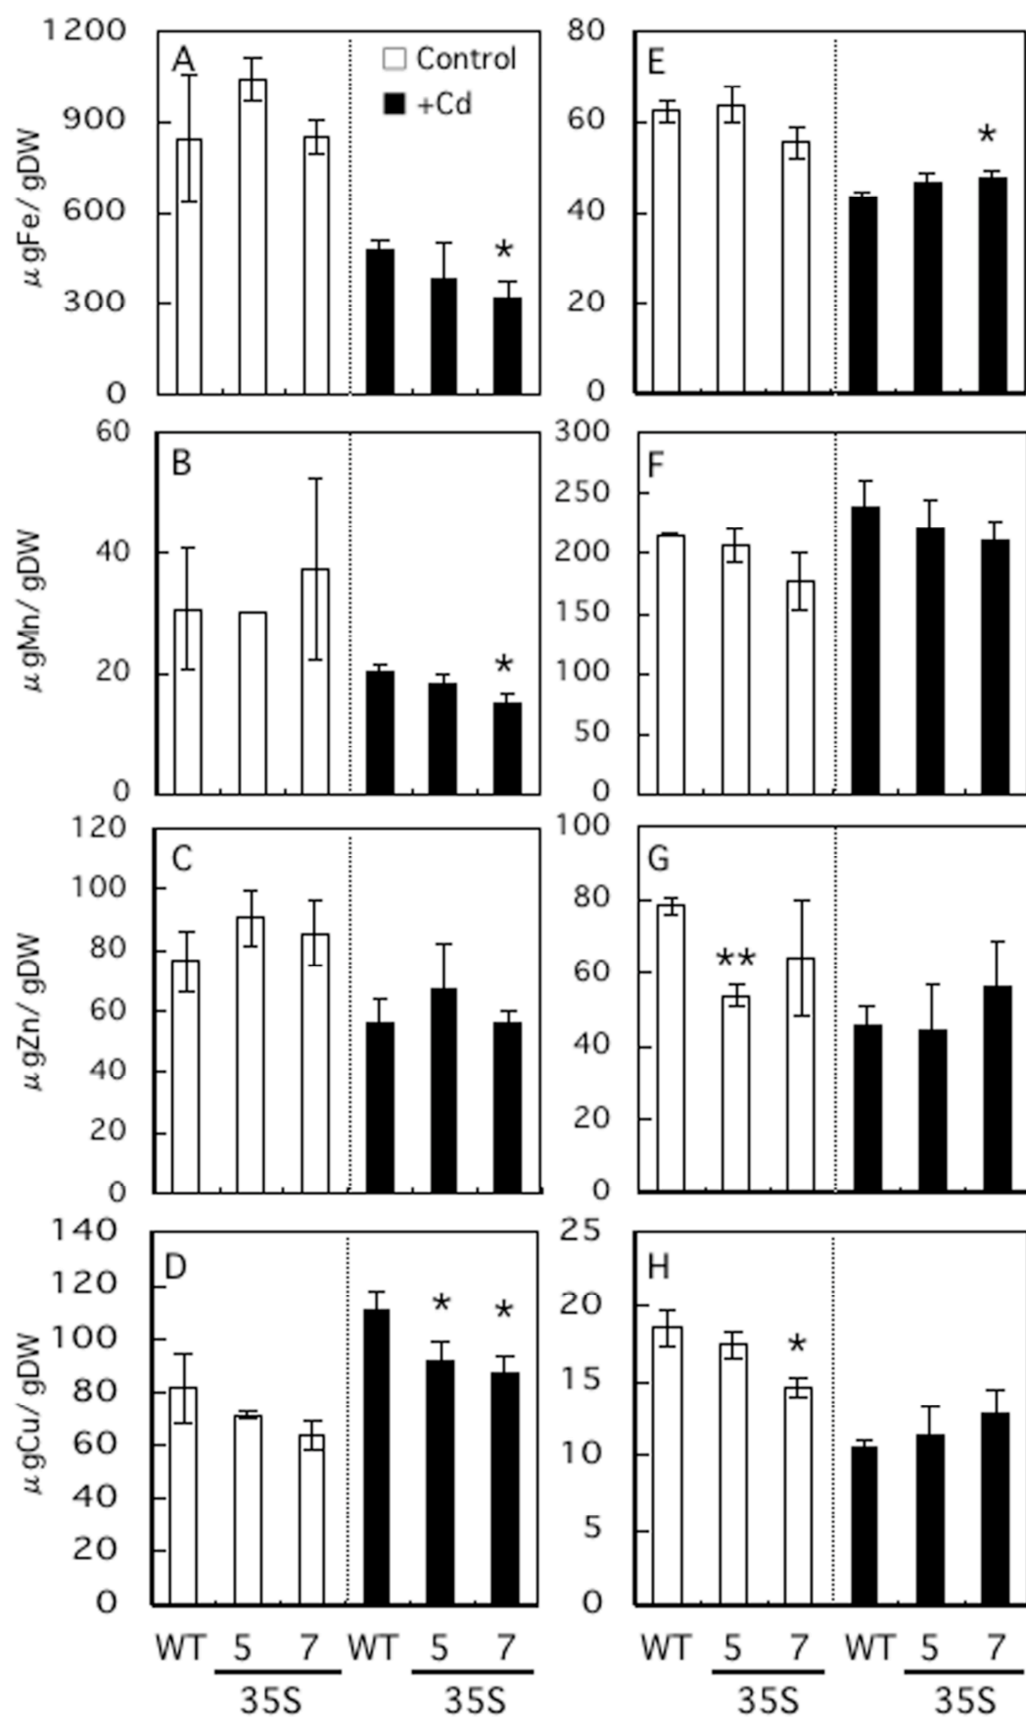

Figure S3

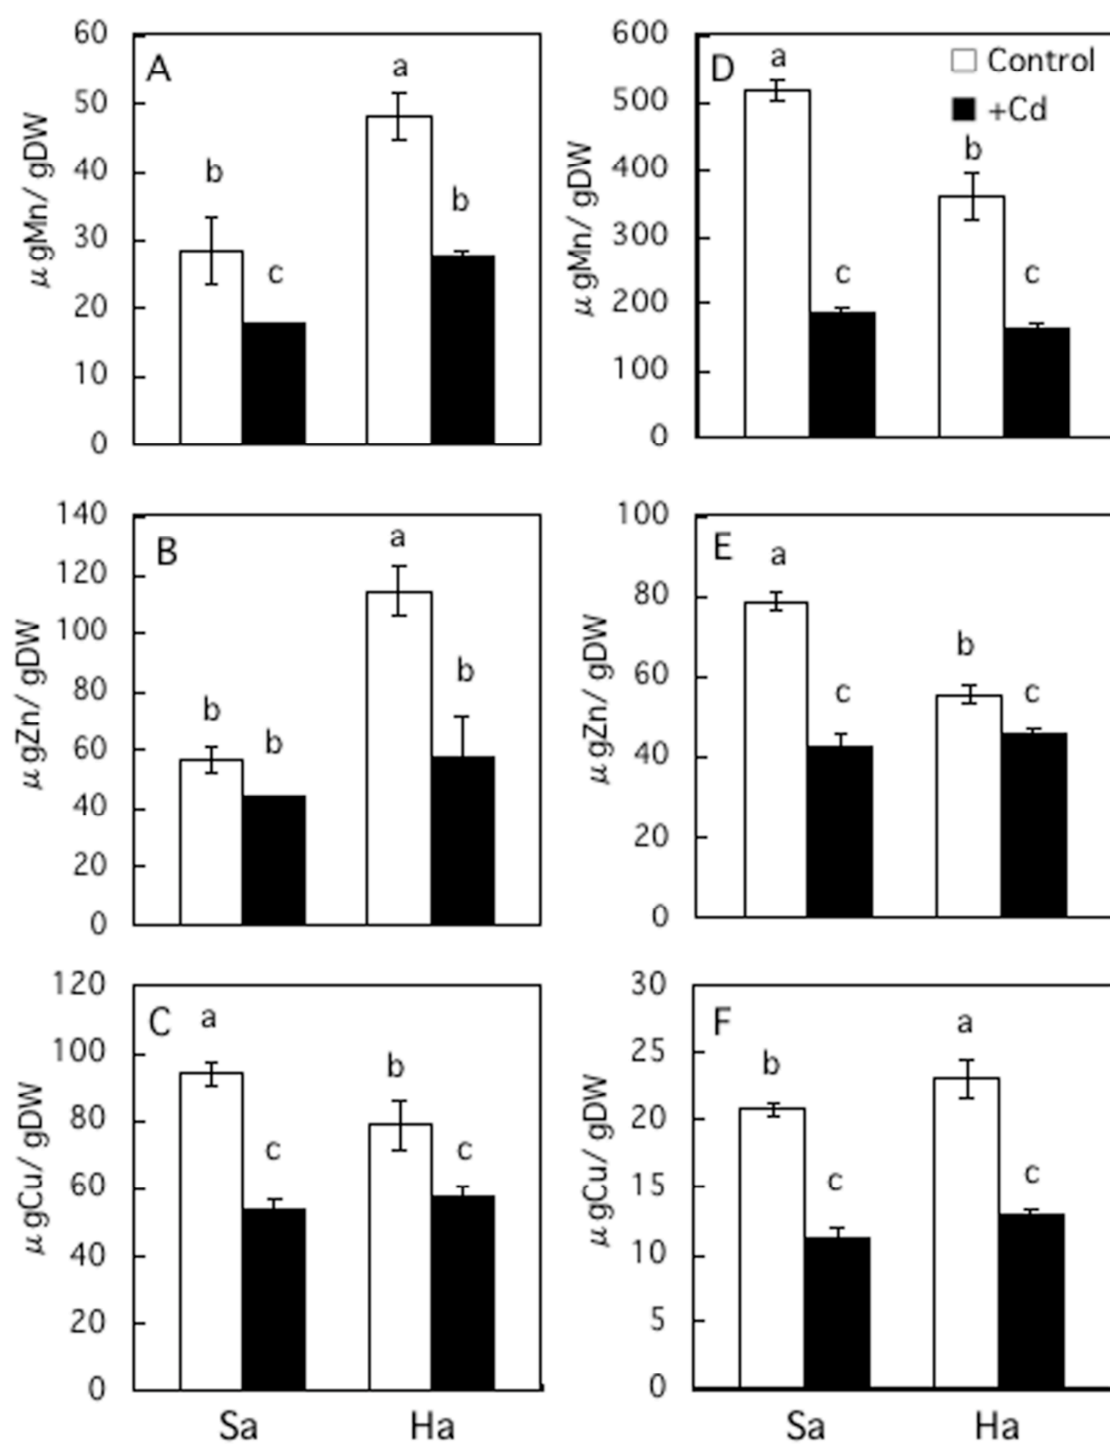

Supplement: supp_err136_00058214_file001.pdf [file supp_err136_00058214_file001.pdf]
